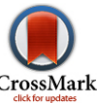

## Correction

# Correction: Clustering of Vector Control Interventions Has Important Consequences for Their Effectiveness: A Modelling Study

The *PLOS ONE* Staff

## Notice of Republication

This article was republished on June 3rd, 2014, due to the figures being ordered incorrectly. The publisher apologizes for this error. Please download the PDF again to view the corrected article. The originally published, uncorrected article and the republished, corrected article are provided here for reference.

## Supporting Information

**File S1.** Originally published, uncorrected article.  
(PDF)

**File S2.** Republished, corrected article.  
(PDF)

## Reference

1. Lutambi AM, Chitnis N, Briët OJT, Smith TA, Penny MA (2014) Clustering of Vector Control Interventions Has Important Consequences for Their Effectiveness: A Modelling Study. *PLoS ONE* 9(5): e97065. doi:10.1371/journal.pone.0097065

**Citation:** The *PLOS ONE* Staff (2014) Correction: Clustering of Vector Control Interventions Has Important Consequences for Their Effectiveness: A Modelling Study. *PLoS ONE* 9(6): e101625. doi:10.1371/journal.pone.0101625

**Published:** June 27, 2014

**Copyright:** © 2014 The *PLOS ONE* Staff. This is an open-access article distributed under the terms of the Creative Commons Attribution License, which permits unrestricted use, distribution, and reproduction in any medium, provided the original author and source are credited.
